# Supplementary material for: Analysis of large versus small dogs reveals three genes on the canine X chromosome associated with body weight, muscling and back fat thickness
Source: PLoS Genet. 2017 Mar 3;13(3):e1006661. doi: 10.1371/journal.pgen.1006661 (PMC5357063; doi:10.1371/journal.pgen.1006661)
Supplement: S7 Table — (XLSX) [file pgen.1006661.s012.xlsx]

## Sheet: Sheet1
Table S7. Primers used for PCR and Sanger sequencing
Gene	Variant (Alleles)	Position	Forward	Tm	Reverse	Tm	Fragment size (bp)	Analyses
IRS4-Deletion	Both primers spanning the 56-kb deletion	chrX:82455122-82511835	TCATGCACCATCAGCTTAGAA	59.4	AGGAGTCAATCCCAAAATGCT	60	490	No PCR product produced in breeds with SBW <41 kg and thin giant breeds
IRS4-Deletion	Primer R inside the 56-kb fragment	chrX:82455122-82455738	TCATGCACCATCAGCTTAGAA	59.4	TGGACAGGCCTAGGGAGTATT	60	617	No PCR product produced in bulky breeds with SBW >41 kg
ACSL4	C/T	chrX:82919216+82919715	TCCACTAGTTTGCTTAATTTGGAA	59.2	GCTTCATGGTGATAATCTGCTT	58.4	500	T only detected in bulky breeds
AMMECR1	G/C	chrX:83430114+83430707	AACCTACTCAGTGCTGGATGC	59.4	AGGGCAGTGGACAAGAACAC	60.2	594	C only detected in bulky breeds
IGSF1	T/G	chrX:102364717-102365275	CTGCCTGGCTCTAAGATTGG	59.97	GAGAGGAGGAGCCCTGAAAT	59.78	559	G associated to the large haplotype and muscled breeds
IGSF1	AAC/-	chrX:102369186-102369789	GGCATGGCCTGAGTAACAGT	60.14	AGTGGGGAAGGGAGCATAAT	59.79	604	Deletion associated with the large haplotype and muscled breeds
